# Supplementary material for: Robust Supramolecular Dimers Derived from Benzylic-Substituted 1,2,4-Selenodiazolium Salts Featuring Selenium⋯π Chalcogen Bonding
Source: MDPI journal article supplement (doi:10.3390/ijms232314973), 2022-11-29
Supplement: s1 [file s1]

Table S1. Crystal data and structure refinement for 2-10.

| Identification code                     | 2                                                                    | 3                                                              | 4                                                                |
|-----------------------------------------|----------------------------------------------------------------------|----------------------------------------------------------------|------------------------------------------------------------------|
| Empirical formula                       | C <sub>7</sub> H <sub>6.5</sub> Cl <sub>1.5</sub> NSe <sub>0.5</sub> | C <sub>17</sub> H <sub>13</sub> ClN <sub>2</sub> Se            | C <sub>13</sub> H <sub>9</sub> Cl <sub>3</sub> N <sub>2</sub> Se |
| Formula weight                          | 197.29                                                               | 359.70                                                         | 378.53                                                           |
| Temperature/K                           | 150.00                                                               | 100                                                            | 100.15                                                           |
| Crystal system                          | monoclinic                                                           | tetragonal                                                     | triclinic                                                        |
| Space group                             | P2 <sub>1</sub> /m                                                   | P4 <sub>1</sub>                                                | P-1                                                              |
| a/Å                                     | 9.0688(9)                                                            | 7.9243(6)                                                      | 7.86270(10)                                                      |
| b/Å                                     | 6.9679(6)                                                            | 7.9243(6)                                                      | 8.5138(2)                                                        |
| c/Å                                     | 12.7072(10)                                                          | 22.6512(12)                                                    | 11.0901(2)                                                       |
| $\alpha$ /°                             | 90                                                                   | 90                                                             | 78.3468(6)                                                       |
| $\beta$ /°                              | 95.281(4)                                                            | 90                                                             | 88.0530(6)                                                       |
| $\gamma$ /°                             | 90                                                                   | 90                                                             | 69.5161(6)                                                       |
| Volume/Å <sup>3</sup>                   | 799.57(12)                                                           | 1422.4(2)                                                      | 680.57(2)                                                        |
| Z                                       | 4                                                                    | 4                                                              | 2                                                                |
| $\rho_{\text{calc}}$ /cm <sup>3</sup>   | 1.639                                                                | 1.680                                                          | 1.847                                                            |
| $\mu$ /mm <sup>-1</sup>                 | 2.840                                                                | 2.821                                                          | 3.332                                                            |
| F(000)                                  | 392.0                                                                | 720.0                                                          | 372.0                                                            |
| Radiation                               | MoK $\alpha$ ( $\lambda$ = 0.71073)                                  | MoK $\alpha$ ( $\lambda$ = 0.71073)                            | MoK $\alpha$ ( $\lambda$ = 0.71073)                              |
| 2 $\Theta$ range for data collection/°  | 5.296 to 60.146                                                      | 5.14 to 53.978                                                 | 3.752 to 65.286                                                  |
| Reflections collected                   | 5664                                                                 | 15269                                                          | 17088                                                            |
| Independent reflections                 | 2293 [ $R_{\text{int}}$ = 0.0280, $R_{\text{sigma}}$ = 0.0382]       | 3037 [ $R_{\text{int}}$ = 0.0457, $R_{\text{sigma}}$ = 0.0427] | 4970 [ $R_{\text{int}}$ = 0.0309, $R_{\text{sigma}}$ = 0.0313]   |
| Data/restraints/parameters              | 2293/0/115                                                           | 3037/1/190                                                     | 4970/0/173                                                       |
| Goodness-of-fit on F <sup>2</sup>       | 1.061                                                                | 1.041                                                          | 1.025                                                            |
| Final R indexes [ $I \geq 2\sigma(I)$ ] | $R_1$ = 0.0268, $wR_2$ = 0.0565                                      | $R_1$ = 0.0214, $wR_2$ = 0.0458                                | $R_1$ = 0.0235, $wR_2$ = 0.0511                                  |

|                                    |                                                                     |                                                                     |                                                                    |
|------------------------------------|---------------------------------------------------------------------|---------------------------------------------------------------------|--------------------------------------------------------------------|
| Final R indexes [all data]         | R <sub>1</sub> = 0.0334, wR <sub>2</sub> = 0.0602                   | R <sub>1</sub> = 0.0231, wR <sub>2</sub> = 0.0464                   | R <sub>1</sub> = 0.0296, wR <sub>2</sub> = 0.0537                  |
| Identification code                | 5                                                                   | 6                                                                   | 7                                                                  |
| Empirical formula                  | C <sub>13</sub> H <sub>11</sub> N <sub>2</sub> Cl <sub>4</sub> SeAu | C <sub>17</sub> H <sub>13</sub> AuCl <sub>4</sub> N <sub>2</sub> Se | C <sub>13</sub> H <sub>9</sub> AuCl <sub>6</sub> N <sub>2</sub> Se |
| Formula weight                     | 612.96                                                              | 663.02                                                              | 681.85                                                             |
| Temperature/K                      | 100.15                                                              | 100.15                                                              | 100.15                                                             |
| Crystal system                     | monoclinic                                                          | monoclinic                                                          | monoclinic                                                         |
| Space group                        | P2 <sub>1</sub> /n                                                  | P2 <sub>1</sub> /n                                                  | P2 <sub>1</sub> /c                                                 |
| a/Å                                | 13.2183(3)                                                          | 12.7620(5)                                                          | 7.84726(5)                                                         |
| b/Å                                | 10.30381(19)                                                        | 11.5911(4)                                                          | 31.83002(11)                                                       |
| c/Å                                | 13.2745(3)                                                          | 13.1164(5)                                                          | 7.92815(6)                                                         |
| α/°                                | 90                                                                  | 90                                                                  | 90                                                                 |
| β/°                                | 110.170(3)                                                          | 105.5418(8)                                                         | 112.0285(7)                                                        |
| γ/°                                | 90                                                                  | 90                                                                  | 90                                                                 |
| Volume/Å <sup>3</sup>              | 1697.10(7)                                                          | 1869.31(12)                                                         | 1835.71(2)                                                         |
| Z                                  | 4                                                                   | 4                                                                   | 4                                                                  |
| ρ <sub>calc</sub> /cm <sup>3</sup> | 2.399                                                               | 2.356                                                               | 2.467                                                              |
| μ/mm <sup>-1</sup>                 | 11.435                                                              | 10.392                                                              | 25.355                                                             |
| F(000)                             | 1136.0                                                              | 1240.0                                                              | 1264.0                                                             |
| Radiation                          | MoKα (λ = 0.71073)                                                  | MoKα (λ = 0.71073)                                                  | CuKα (λ = 1.54184)                                                 |
| 2θ range for data collection/°     | 5.13 to 63.404                                                      | 4.768 to 65.676                                                     | 5.552 to 155.488                                                   |
| Reflections collected              | 30962                                                               | 49613                                                               | 195254                                                             |
| Independent reflections            | 4943 [R <sub>int</sub> = 0.0382, R <sub>sigma</sub> = 0.0262]       | 6901 [R <sub>int</sub> = 0.0340, R <sub>sigma</sub> = 0.0196]       | 3867 [R <sub>int</sub> = 0.1391, R <sub>sigma</sub> = 0.0226]      |
| Data/restraints/parameters         | 4943/0/191                                                          | 6901/0/227                                                          | 3867/0/209                                                         |
| Goodness-of-fit on F <sup>2</sup>  | 1.086                                                               | 1.094                                                               | 1.093                                                              |
| Final R indexes [I>=2σ (I)]        | R <sub>1</sub> = 0.0189, wR <sub>2</sub> = 0.0384                   | R <sub>1</sub> = 0.0255, wR <sub>2</sub> = 0.0519                   | R <sub>1</sub> = 0.0373, wR <sub>2</sub> = 0.1017                  |
| Final R indexes [all data]         | R <sub>1</sub> = 0.0244, wR <sub>2</sub> = 0.0394                   | R <sub>1</sub> = 0.0310, wR <sub>2</sub> = 0.0537                   | R <sub>1</sub> = 0.0373, wR <sub>2</sub> = 0.1017                  |

|                                    |                                                                    |                                                                    |                                                                                                |
|------------------------------------|--------------------------------------------------------------------|--------------------------------------------------------------------|------------------------------------------------------------------------------------------------|
| Identification code                | 8                                                                  | 9                                                                  | 10                                                                                             |
| Empirical formula                  | C <sub>13</sub> H <sub>11</sub> ClN <sub>2</sub> O <sub>4</sub> Se | C <sub>17</sub> H <sub>13</sub> ClN <sub>2</sub> O <sub>4</sub> Se | C <sub>69</sub> H <sub>56</sub> F <sub>24</sub> N <sub>8</sub> OP <sub>4</sub> Se <sub>4</sub> |
| Formula weight                     | 373.65                                                             | 423.70                                                             | 1908.93                                                                                        |
| Temperature/K                      | 100.15                                                             | 100.00                                                             | 103.15                                                                                         |
| Crystal system                     | monoclinic                                                         | monoclinic                                                         | monoclinic                                                                                     |
| Space group                        | P2 <sub>1</sub> /n                                                 | P2 <sub>1</sub> /n                                                 | P2 <sub>1</sub> /n                                                                             |
| a/Å                                | 10.7064(2)                                                         | 14.642(6)                                                          | 14.9255(4)                                                                                     |
| b/Å                                | 11.4972(2)                                                         | 13.984(10)                                                         | 14.1500(4)                                                                                     |
| c/Å                                | 12.0482(2)                                                         | 17.319(8)                                                          | 17.2098(4)                                                                                     |
| α/°                                | 90                                                                 | 90                                                                 | 90                                                                                             |
| β/°                                | 107.1724(5)                                                        | 91.858(15)                                                         | 92.295(2)                                                                                      |
| γ/°                                | 90                                                                 | 90                                                                 | 90                                                                                             |
| Volume/Å <sup>3</sup>              | 1416.94(4)                                                         | 3544(3)                                                            | 3631.72(16)                                                                                    |
| Z                                  | 4                                                                  | 8                                                                  | 2                                                                                              |
| ρ <sub>calc</sub> /cm <sup>3</sup> | 1.752                                                              | 1.588                                                              | 1.746                                                                                          |
| μ/mm <sup>-1</sup>                 | 2.855                                                              | 2.294                                                              | 4.262                                                                                          |
| F(000)                             | 744.0                                                              | 1696.0                                                             | 1892.0                                                                                         |
| Radiation                          | MoKα (λ = 0.71073)                                                 | MoKα (λ = 0.71073)                                                 | CuKα (λ = 1.54184)                                                                             |
| 2θ range for data collection/°     | 5.712 to 65.168                                                    | 3.586 to 54.998                                                    | 7.69 to 156.544                                                                                |
| Reflections collected              | 50063                                                              | 17580                                                              | 46447                                                                                          |
| Independent reflections            | 5138 [R <sub>int</sub> = 0.0226, R <sub>sigma</sub> = 0.0111]      | 8081 [R <sub>int</sub> = 0.0443, R <sub>sigma</sub> = 0.0780]      | 7670 [R <sub>int</sub> = 0.0976, R <sub>sigma</sub> = 0.0480]                                  |
| Data/restraints/parameters         | 5138/0/191                                                         | 8081/16/439                                                        | 7670/0/507                                                                                     |
| Goodness-of-fit on F <sup>2</sup>  | 1.040                                                              | 1.034                                                              | 1.144                                                                                          |
| Final R indexes [I ≥ 2σ (I)]       | R <sub>1</sub> = 0.0165, wR <sub>2</sub> = 0.0434                  | R <sub>1</sub> = 0.0694, wR <sub>2</sub> = 0.1496                  | R <sub>1</sub> = 0.0864, wR <sub>2</sub> = 0.2162                                              |
| Final R indexes [all data]         | R <sub>1</sub> = 0.0183, wR <sub>2</sub> = 0.0444                  | R <sub>1</sub> = 0.1015, wR <sub>2</sub> = 0.1629                  | R <sub>1</sub> = 0.0894, wR <sub>2</sub> = 0.2183                                              |
